# Supplementary material for: Influence of surfactants on selective mechanical separation of fine active materials used in high temperature electrolyzers contributing to circular economy
Source: Royal Society of Chemistry journal article supplement (doi:10.1039/d4im00044g), 2024-01-01
Supplement: d4im00044g1.pdf [file d4im00044g1.pdf]

Supplementary Material

Influence of surfactants on selective mechanical separation of fine high temperature electrolyzer active materials contributing to circular economy

Sohyun Ahn<sup>\*a</sup>, Suvarna Patil<sup>a</sup>, and Martin Rudolph<sup>a</sup>

<sup>a</sup> Helmholtz-Zentrum Dresden-Rossendorf, Helmholtz Institute Freiberg for Resource Technology, Chemnitz StraÙe 40, Freiberg 09599, Germany

\* Corresponding author: [s.ahn@hzdr.de](mailto:s.ahn@hzdr.de)

Physical  
of the studied

properties  
materials

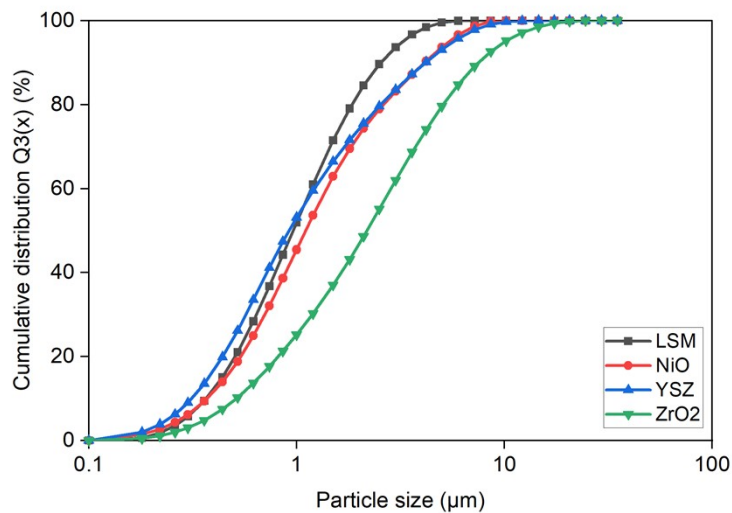

Fig. S1 Cumulative volume (mass) weighted particle size distributions obtained by laser diffraction with dry high intensity dispersing

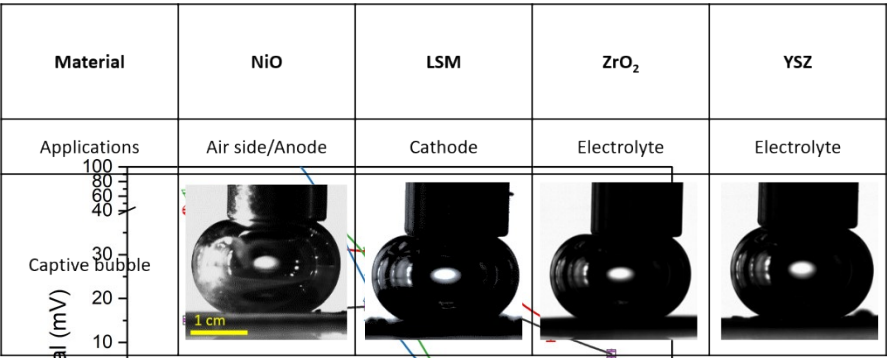

Fig. S2 Images of water contact angle of the studied particles using captive bubble method

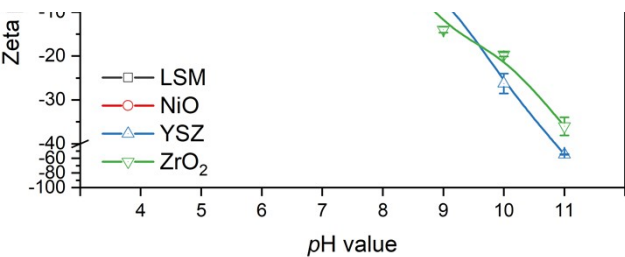

Fig. S3 Effect of pH on the zeta potentials of the HTL materials. Surface charge of the electrode materials (LSM and NiO) remains positive with increase in the pH. The lines are guides for the eye. The error bars indicate 95% confidence intervals.

### Calculation of surfactant molar concentration for covering particle surface ( $c_s$ )

**Table S1** Information about necessary parameters in the calculation of surfactant concentration for covering each particle surface

|                                                 | NiO                  | LSM      | YSZ                  | ZrO <sub>2</sub> |
|-------------------------------------------------|----------------------|----------|----------------------|------------------|
| Type of surfactant                              | CTAB                 |          | SDS                  |                  |
| Surface area of head group <sup>a,b</sup>       | 1E-18 m <sup>2</sup> |          | 6E-19 m <sup>2</sup> |                  |
| $c_s$                                           | 1.3E-4 M             | 8.8E-6 M | 2.2E-5 M             | 6.7E-5 M         |
| Obtained value through measuring zeta potential | 1E-5 M               | 1E-4 M   | 2E-5 M               | 5E-5 M           |

a (Almgren & Swarup, 1983)

b (Das, Roy, Mitra, Dasgupta, & Das, 2005)

$c_s =$

$$\frac{\text{Mass of particle (g)} * \text{Specific surface area (m}^2\text{g}^{-1}\text{)}}{\text{Volume of solution (l)} * \text{Area of head group (m}^2\text{)} * \text{avogadro's number (mol}^{-1}\text{)}}$$

Trial combinations of the surfactant with the dispersion in order to have effective/proper separation

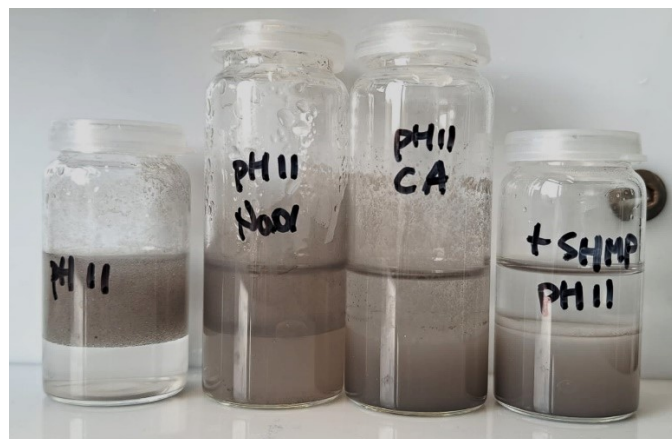

**Fig. S4** Effect of different types of dispersants in NiO dispersions at pH 11 From left to right: no dispersant (reference), sodium oleate (NaOl), citric acid (CA), and sodium hexametaphosphate (SHMP)

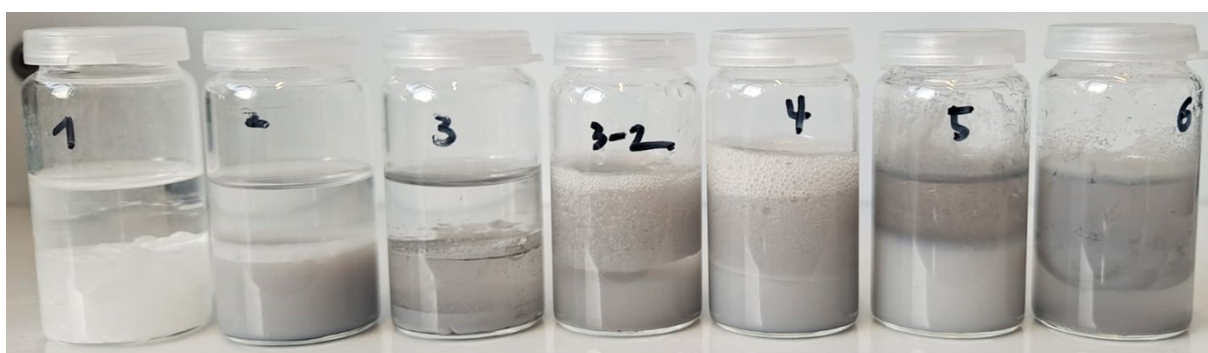

**Fig. S5** Effect of different combinations of surfactant and dispersant at different pH. From left to right 1 to 6  
 1: solid electrolyte materials (YSZ and  $\text{ZrO}_2$ ) with CTAB at pH 11, 2: particle mixtures (NiO, YSZ, and  $\text{ZrO}_2$ ) with SHMP at pH 11, 3: particle mixtures (NiO, YSZ, and  $\text{ZrO}_2$ ) with a combination of CTAB and Citric acid at pH 11, 3-2: same condition as bottle 3 but with higher CTAB concentration at pH 11, 4: particle mixtures (NiO, YSZ, and  $\text{ZrO}_2$ ) with a combination of SDS and SHMP at pH 11, 5: particle mixtures (NiO, YSZ, and  $\text{ZrO}_2$ ) with SDS at pH 8. 6: particle mixtures (NiO, YSZ, and  $\text{ZrO}_2$ ) with SDS at pH 4

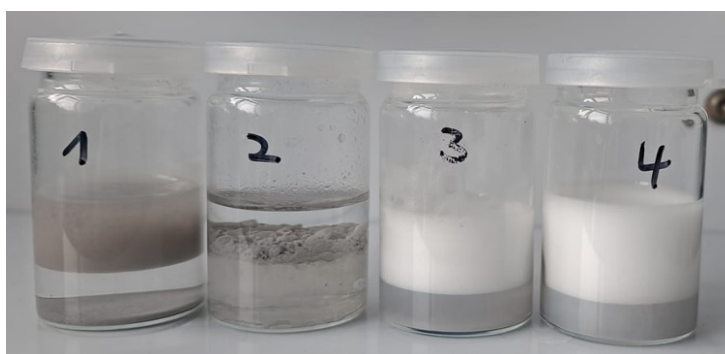

**Fig. S6** Particle mixtures (NiO, YSZ, and  $\text{ZrO}_2$ ) with different combinations of surfactant, dispersant, ultrasonic treatment  
 1: without any reagents at pH 11, 2: with CATB and citric acid at pH 11, 3: with a combination of SDS and SHMP at pH 8, agitation with ultra-sonotrode, 4: same condition as bottle 3 at pH 11, agitation with ultra-sonotrode

- Almgren, M., & Swarup, S. (1983). Size of sodium dodecyl sulfate micelles in the presence of additives. 3. Multivalent and hydrophobic counterions, cationic and nonionic surfactants. *The Journal of Physical Chemistry*, 87(5), 876-881. doi:10.1021/j100228a036
- Das, D., Roy, S., Mitra, R. N., Dasgupta, A., & Das, P. K. (2005). Head-Group Size or Hydrophilicity of Surfactants: The Major Regulator of Lipase Activity in Cationic Water-in-Oil Microemulsions. *Chemistry – A European Journal*, 11(17), 4881-4889.  
doi:<https://doi.org/10.1002/chem.200500244>
